# Supplementary material for: Dynamic and Static Analysis of Environmental Variables in Coronavirus Spread
Source: Research Square preprint supplement (doi:10.21203/rs.3.rs-5058743/v1), 2025-04-17
Supplement: Supplementary file 1 [file dba17c939bc389537e549df0.xlsx]

## Sheet: Summary of Tables
	File Name	Table Name
	Dynamic analysis results in all provinces between hospitalised cases and pollutants
		Dynamic analysis results in all provinces between positive cases and pollutants	Dynamic analysis results in all
	Positive cases
		Table 1	Positive cases
	Hospitalised cases
		Table 1	Hospitalised cases

## Sheet: Positive cases
Dynamic analysis results in all provinces between positive cases and pollutants
Cross-correlation factor	error	lag(day)	CP(0.8-0.9)	CP(>0.9)	Pollutant	Province
0.71	0.18	0	0.6	0.33	NO	Agrigento
0.9	0.16	-10	0.68	0.42	SO2	Agrigento
0.99	0.11	29	0.34	0.26	NO	Alessandria
0.97	0.07	-4	0.75	0.66	SO2	Alessandria
0.93	0.07	6	0.52	0.42	PM10	Alessandria
0.96	0.09	10	0.84	0.19	NO	Ancona
0.95	0.09	-10	0.46	0.38	SO2	Ancona
0.78	0.13	-6	0.62	1.19	PM10	Ancona
0.96	0.13	16	NaN	0.52	NO	Aosta
0.9	0.11	-12	0.21	0.14	SO2	Aosta
0.89	0.09	-13	0.49	0.38	PM10	Aosta
0.98	0.1	29	0.24	0.18	NO	Arezzo
0.91	0.1	-7	0.76	0.18	SO2	Arezzo
0.58	0.15	-6	0.88	0.18	PM10	Arezzo
0.92	0.1	15	NaN	0.21	NO	Ascoli-Piceno
0.87	0.1	-10	0.24	0.41	SO2	Ascoli-Piceno
0.96	0.12	38	NaN	0.36	NO	Asti
0.92	0.06	5	0.09	0.36	SO2	Asti
0.84	0.08	13	0.54	0.36	PM10	Asti
0.68	0.1	-11	0.08	0.19	NO	Avellino
0.88	0.12	-8	0.8	0.2	SO2	Avellino
0.8	0.06	5	0.4	0.18	NO	Bari
0.95	0.11	-6	0.4	0.36	SO2	Bari
0.75	0.09	-33	0.35	0.55	PM10	Bari
0.91	0.14	-25	0.4	0.66	PM10	Barletta-Andria-Trani
0.98	0.1	2	0.42	0.48	SO2	Barletta-Andria-Trani
0.75	0.13	3	0.16	0.42	NO	Barletta-Andria-Trani
0.94	0.11	36	0.78	0.2	NO	Belluno
0.94	0.05	-5	0.88	0.19	SO2	Belluno
0.89	0.1	-3	NaN	0.2	PM10	Belluno
0.75	0.12	0	0.2	0.36	NO	Benevento
0.95	0.12	0	0.25	0.97	SO2	Benevento
0.77	0.14	-26	0.76	0.57	PM10	Benevento
0.96	0.14	4	NaN	0.05	NO	Bergamo
0.94	0.09	-31	NaN	0.05	SO2	Bergamo
0.94	0.09	-30	NaN	0.06	PM10	Bergamo
0.89	0.1	17	0.59	0.19	NO	Biella
0.84	0.1	-6	0.21	0.82	SO2	Biella
0.83	0.11	-4	1.2	0.19	PM10	Biella
0.99	0.09	15	NaN	0.4	NO	Bologna
0.93	0.07	-6	0.29	0.21	SO2	Bologna
0.92	0.08	4	0.52	0.2	PM10	Bologna
0.98	0.12	-8	0.56	0.3	SO2	Bolzano
0.83	0.09	-12	0.19	1.03	PM10	Bolzano
0.98	0.14	9	0.23	0.02	NO	Brescia
0.94	0.09	-23	0.15	0.02	SO2	Brescia
0.94	0.09	-20	0.71	NaN	PM10	Brescia
0.92	0.08	-4	0.03	0.13	SO2	Brindisi
0.88	0.13	-35	0.16	0.15	PM10	Brindisi
0.98	0.1	-9	0.6	0.22	SO2	Cagliari
0.96	0.15	-26	0.72	0.21	PM10	Cagliari
0.81	0.12	-9	0.21	0.17	NO	Caltanissetta
0.92	0.1	-4	0.95	0.22	SO2	Caltanissetta
0.93	0.14	-37	0.65	0.2	PM10	Caltanissetta
0.46	0.17	22	0.54	0.35	NO	Campobasso
0.95	0.12	32	0.61	0.24	SO2	Campobasso
0.8	0.08	-10	0.56	0.21	NO	Caserta
0.9	0.1	-10	0.67	0.19	SO2	Caserta
0.71	0.1	-38	1.41	0.21	PM10	Caserta
0.82	0.11	-23	0.41	0.25	NO	Catania
0.87	0.07	-17	0.78	0.25	SO2	Catania
0.85	0.15	12	0.34	NaN	NO	Catanzaro
0.85	0.13	-6	0.44	0.73	SO2	Catanzaro
0.95	0.07	17	NaN	0.57	NO	Chieti
0.95	0.1	-6	0.19	0.54	SO2	Chieti
0.64	0.09	-29	0.36	1.01	PM10	Chieti
0.96	0.1	31	0.27	0.3	NO	Como
0.95	0.07	1	0.28	0.04	SO2	Como
0.94	0.05	5	0.51	0.36	PM10	Como
0.9	0.14	11	0.41	0.62	NO	Cosenza
0.89	0.1	0	0.61	0.38	SO2	Cosenza
0.95	0.08	3	0.41	0.61	NO	Cremona
0.94	0.08	-22	1.06	0.76	SO2	Cremona
0.96	0.08	-8	0.69	1.35	PM10	Cremona
0.63	0.17	-26	0.02	0.21	SO2	Crotone
0.99	0.12	31	NaN	0.56	NO	Cuneo
0.95	0.09	0	0.48	0.5	SO2	Cuneo
0.91	0.08	3	0.98	0.5	PM10	Cuneo
0.77	0.13	-21	0.5	0.38	NO	Enna
0.89	0.1	-11	0.01	0.19	SO2	Enna
0.87	0.1	-10	0.2	0.35	SO2	Fermo
0.7	0.15	-9	0.84	0.85	PM10	Fermo
0.95	0.08	-4	0.38	0.21	SO2	Ferrara
0.85	0.11	9	0.41	0.48	PM10	Ferrara
1	0.09	20	0.39	0.33	NO	Firenze
0.94	0.08	-4	0.59	1.09	SO2	Firenze
0.8	0.11	2	0.3	1.57	PM10	Firenze
0.9	0.09	9	0.24	0.17	NO	Foggia
0.92	0.09	-4	NaN	0.21	SO2	Foggia
0.82	0.11	-24	0.23	0.49	PM10	Foggia
0.95	0.1	15	NaN	0.9	NO	Forli-Cesena
0.91	0.09	-8	0.56	0.7	SO2	Forli-Cesena
0.81	0.13	0	0.44	0.47	PM10	Forli-Cesena
0.71	0.09	-10	0.67	0.77	NO	Frosinone
0.91	0.12	-13	0.77	0.62	SO2	Frosinone
0.77	0.05	-3	0.05	0.92	SO2	Genova
0.86	0.06	5	0.32	1.17	PM10	Genova
0.99	0.16	21	1.26	0.25	NO	Gorizia
0.9	0.1	-9	0.76	0.92	SO2	Gorizia
0.77	0.15	-2	1.14	0.87	PM10	Gorizia
0.95	0.1	14	0.4	0.21	NO	Grosseto
0.95	0.12	-10	0.51	0.21	SO2	Grosseto
0.61	0.12	-29	0.59	0.21	PM10	Grosseto
0.99	0.14	24	NaN	2.09	NO	Imperia
0.92	0.09	-6	0.4	1.8	SO2	Imperia
0.88	0.08	-2	0.29	1.94	PM10	Imperia
0.92	0.28	34	NaN	0.22	NO	Isernia
0.98	0.17	3	0.54	0.21	SO2	Isernia
0.85	0.13	-22	0.62	0.55	PM10	Isernia
0.77	0.16	15	0.19	0.64	NO	LAquila
0.97	0.08	-5	0.5	0.02	SO2	LAquila
0.47	0.14	-21	0.33	1.14	PM10	LAquila
0.98	0.12	16	0.71	0.56	NO	LaSpezia
0.88	0.09	-12	0.58	0.5	SO2	LaSpezia
0.74	0.12	-4	0.93	0.72	PM10	LaSpezia
0.87	0.08	3	0.38	1.1	NO	Latina
0.93	0.09	-16	1.01	0.57	SO2	Latina
0.66	0.1	-37	0.83	1.32	PM10	Latina
0.87	0.23	38	0.51	1.07	NO	Lecce
0.76	0.1	-14	0.57	0.35	SO2	Lecce
0.98	0.19	20	0.2	0.07	NO	Lecco
0.85	0.09	-20	0.62	0.26	SO2	Lecco
0.85	0.09	-19	0.89	0.58	PM10	Lecco
0.76	0.12	-14	NaN	0.43	NO	Livorno
0.84	0.11	-10	0.75	0.85	SO2	Livorno
0.58	0.09	-19	0.56	0.77	PM10	Livorno
0.95	0.1	16	0.02	0.15	NO	Lodi
0.92	0.11	-35	0.42	0.66	SO2	Lodi
0.91	0.12	-33	1	0.59	PM10	Lodi
0.94	0.09	10	NaN	0.26	NO	Lucca
0.86	0.09	-13	0.35	0.26	SO2	Lucca
0.77	0.14	-4	0.4	0.26	PM10	Lucca
0.98	0.11	14	0.04	1.04	NO	Macerata
0.94	0.1	-9	0.39	0.99	SO2	Macerata
0.72	0.12	-8	0.02	1.39	PM10	Macerata
0.88	0.08	10	0.64	0.11	NO	Mantova
0.94	0.08	-13	0.52	0.04	SO2	Mantova
0.88	0.08	3	0.94	0.26	PM10	Mantova
0.94	0.09	11	NaN	0.76	NO	Massa-Carrara
0.89	0.09	-12	0.22	0.58	SO2	Massa-Carrara
0.83	0.12	-2	0.22	0.76	PM10	Massa-Carrara
0.65	0.09	-8	0.38	NaN	NO	Matera
0.87	0.1	-6	0.21	0.41	SO2	Matera
0.86	0.11	-38	0.54	0.46	PM10	Matera
0.56	0.09	-3	0.79	0.77	NO	Messina
0.83	0.09	-14	0.46	0.16	SO2	Messina
0.98	0.05	17	0.27	0.35	NO	Milano
0.95	0.07	-3	0.4	0.47	SO2	Milano
0.95	0.07	6	1.44	0.32	PM10	Milano
0.95	0.08	-15	0.26	0.19	SO2	Modena
0.89	0.09	-4	0.24	0.19	PM10	Modena
0.97	0.16	35	0.7	0.07	NO	MonzaedellaBrianza
0.92	0.08	-11	0.19	0.74	SO2	MonzaedellaBrianza
0.88	0.05	-5	0.84	0.64	PM10	MonzaedellaBrianza
0.93	0.07	-6	0.45	0.22	NO	Napoli
0.95	0.08	-10	0.32	0.63	SO2	Napoli
0.83	0.11	-33	NaN	0.46	PM10	Napoli
0.96	0.1	25	0.2	0.5	NO	Novara
0.92	0.08	-1	0.71	0.45	SO2	Novara
0.86	0.08	8	0.4	0.45	PM10	Novara
1	0.21	21	0.76	NaN	NO	Nuoro
0.9	0.2	-10	0.18	0.18	SO2	Nuoro
0.93	0.34	16	0.52	0.39	NO	Oristano
0.89	0.12	5	0.36	0.33	SO2	Oristano
0.86	0.09	-17	0.76	0.61	PM10	Oristano
0.96	0.05	-17	0.52	0.23	SO2	Padova
0.86	0.07	-15	0.5	0.83	PM10	Padova
0.87	0.11	-14	0.35	0.4	NO	Palermo
0.87	0.12	-15	0.76	0.42	SO2	Palermo
0.99	0.12	8	0.28	0.28	NO	Parma
0.93	0.09	-20	0.24	0.43	SO2	Parma
0.94	0.11	-15	0.46	0.18	PM10	Parma
0.97	0.08	14	0.69	NaN	NO	Pavia
0.94	0.07	-6	NaN	0.26	SO2	Pavia
0.96	0.07	4	NaN	0.02	PM10	Pavia
0.8	0.09	9	0.38	0.29	NO	Perugia
0.84	0.11	-13	0.37	0.26	SO2	Perugia
0.93	0.07	-17	0.65	0.38	SO2	PesaroeUrbino
0.83	0.14	-13	1.42	0.37	PM10	PesaroeUrbino
0.9	0.1	35	0.53	0.58	NO	Pescara
0.91	0.12	-10	0.58	0.55	SO2	Pescara
0.51	0.09	-21	0.53	0.92	PM10	Pescara
0.93	0.12	4	0.23	0.63	NO	Piacenza
0.88	0.12	-37	0.26	0.22	SO2	Piacenza
0.86	0.12	-16	1.12	0.15	PM10	Piacenza
0.94	0.09	10	0.46	0.23	NO	Pisa
0.87	0.09	-10	0.26	0.44	SO2	Pisa
0.7	0.1	-9	1.34	0.2	PM10	Pisa
0.97	0.1	15	0.22	0.16	NO	Pistoia
0.86	0.1	-9	0.62	0.61	SO2	Pistoia
0.77	0.15	1	1.28	0.65	PM10	Pistoia
0.96	0.11	17	0.16	0.27	NO	Pordenone
0.83	0.1	-13	0.79	0.53	SO2	Pordenone
0.7	0.09	-5	0.89	0.27	PM10	Pordenone
0.79	0.1	-11	0.41	0.36	NO	Potenza
0.91	0.1	-6	0.14	0.18	SO2	Potenza
0.97	0.07	17	0.62	0.41	NO	Prato
0.88	0.09	-6	0.75	0.74	SO2	Prato
0.77	0.15	3	1.24	0.54	PM10	Prato
0.92	0.13	22	0.35	0.16	NO	Ragusa
0.45	0.13	3	0.45	0.34	SO2	Ragusa
0.84	0.58	38	0.36	0.36	PM10	Ragusa
0.83	0.1	12	0.15	1.71	NO	Ravenna
0.86	0.09	-12	0.6	1.91	SO2	Ravenna
0.8	0.11	1	0.43	1.71	PM10	Ravenna
0.83	0.09	11	0.59	0.51	NO	ReggiodiCalabria
0.96	0.08	17	0.19	0.19	NO	ReggionellEmilia
0.95	0.08	-10	0.15	0.18	SO2	ReggionellEmilia
0.89	0.09	2	0.05	0.41	PM10	ReggionellEmilia
0.78	0.09	12	1.12	0.46	NO	Rieti
0.92	0.11	-9	0.62	0.44	SO2	Rieti
0.38	0.08	-36	0.84	1.38	PM10	Rieti
0.95	0.12	38	0.05	0.23	NO	Rimini
0.91	0.11	-20	0.23	0.23	SO2	Rimini
0.86	0.14	-15	0.69	0.23	PM10	Rimini
0.93	0.07	4	1.11	0.28	NO	Roma
0.94	0.08	-12	0.41	0.32	SO2	Roma
0.62	0.06	-28	0.78	0.95	PM10	Roma
0.96	0.1	-4	0.23	0.2	SO2	Rovigo
0.78	0.15	12	0.2	0.2	PM10	Rovigo
0.9	0.09	-9	0.2	0.43	NO	Salerno
0.97	0.09	-14	0.94	NaN	SO2	Salerno
0.85	0.1	-6	0.37	0.73	SO2	Sassari
0.68	0.09	-33	0.64	0.65	PM10	Sassari
0.85	0.05	-1	0.62	NaN	SO2	Savona
0.92	0.05	5	0.87	0.51	PM10	Savona
0.94	0.09	9	0.58	0.41	NO	Siena
0.9	0.11	-12	1.05	0.38	SO2	Siena
0.59	0.15	-10	1.24	0.58	PM10	Siena
0.8	0.13	-31	0.37	0.34	NO	Siracusa
0.93	0.09	-8	0.19	0.94	SO2	Siracusa
0.98	0.11	-37	0.16	0.47	PM10	Siracusa
0.99	0.12	31	1.07	0.06	NO	Sondrio
0.98	0.08	-1	0.47	0.06	SO2	Sondrio
0.94	0.08	0	0.39	0.05	PM10	Sondrio
0.9	0.2	22	NaN	NaN	NO	SudSardegna
0.92	0.08	-5	0.64	0.2	SO2	SudSardegna
0.81	0.15	-32	0.56	0.88	PM10	SudSardegna
0.9	0.29	35	0.72	0.16	NO	Taranto
0.8	0.11	-9	0.02	0.41	SO2	Taranto
0.84	0.07	17	0.38	0.23	NO	Teramo
0.86	0.1	-9	0.21	0.41	SO2	Teramo
0.91	0.09	12	NaN	NaN	NO	Terni
0.96	0.11	-10	NaN	NaN	SO2	Terni
0.53	0.11	-32	NaN	NaN	PM10	Terni
0.98	0.08	3	0.93	0.18	SO2	Torino
0.98	0.07	4	1.19	0.19	PM10	Torino
0.7	0.25	5	0.46	0.44	NO	Trapani
0.7	0.12	-8	0.73	0.81	SO2	Trapani
0.99	0.12	35	0.14	0.34	NO	Trento
0.94	0.09	-8	0.41	0.49	SO2	Trento
0.87	0.08	-4	0.68	0.63	PM10	Trento
0.99	0.15	36	0.21	0.57	NO	Treviso
0.96	0.09	-16	0.43	0.46	SO2	Treviso
0.89	0.1	-6	0.5	0.75	PM10	Treviso
0.93	0.09	21	1.01	NaN	NO	Trieste
0.98	0.08	-6	0.68	0.26	SO2	Trieste
0.84	0.11	0	0.86	NaN	PM10	Trieste
0.96	0.16	38	0.59	0.37	NO	Udine
0.87	0.06	-17	0.28	0.87	SO2	Udine
0.73	0.13	-8	0.31	1.15	PM10	Udine
0.98	0.09	26	0.63	NaN	NO	Varese
0.94	0.07	3	1.11	NaN	SO2	Varese
0.92	0.08	11	0.87	0.44	PM10	Varese
0.97	0.09	17	0.83	0.41	NO	Venezia
0.96	0.08	-15	0.4	0.39	SO2	Venezia
0.85	0.07	-5	0.76	0.89	PM10	Venezia
0.95	0.11	23	0.65	0.21	NO	Verbano-Cusio-Ossola
0.88	0.1	-6	0.54	0.2	SO2	Verbano-Cusio-Ossola
0.84	0.08	-6	0.46	0.46	PM10	Verbano-Cusio-Ossola
1	0.14	31	0.08	0.98	NO	Vercelli
0.93	0.05	-5	0.3	1.4	SO2	Vercelli
0.85	0.08	-1	1.1	0.85	PM10	Vercelli
0.94	0.08	-9	NaN	NaN	SO2	Verona
0.87	0.08	4	0.39	0.14	PM10	Verona
0.73	0.14	-2	1	1.14	NO	ViboValentia
0.77	0.14	-10	0.82	1.21	SO2	ViboValentia
0.99	0.16	38	0.68	0.19	NO	Vicenza
0.95	0.08	-11	1.03	0.4	SO2	Vicenza
0.88	0.09	1	0.68	0.58	PM10	Vicenza
0.97	0.11	-9	0.24	0.59	SO2	Viterbo
0.5	0.11	-27	0.3	1.62	PM10	Viterbo

## Sheet: Hospitalised cases
Dynamic analysis results in all provinces between hospitalised cases and pollutants
Cross-correlation factor	error	lag(day)	CP(0.8-0.9)	CP(>0.9)	Pollutant	Province
0.57	0.12	-16	0.42	0.17	SO2	Agrigento
0.57	0.11	19	0.79	NaN	SO2	Alessandria
0.72	0.11	18	0.4	NaN	PM10	Alessandria
0.91	0.07	-17	0.54	NaN	SO2	Ancona
0.93	0.1	6	NaN	NaN	NO	Ancona
0.76	0.13	-14	1.35	0.17	PM10	Ancona
0.94	0.12	-18	0.35	0.56	SO2	Aosta
0.98	0.13	12	0.21	NaN	NO	Aosta
0.91	0.1	-18	0.3	0.09	PM10	Aosta
0.86	0.15	-15	0.68	0.27	SO2	Arezzo
0.93	0.11	28	NaN	0.27	NO	Arezzo
0.69	0.24	-6	0.34	0.27	PM10	Arezzo
0.98	0.44	38	0.9	NaN	SO2	Ascoli-Piceno
0.77	0.15	13	NaN	0.16	NO	Ascoli-Piceno
0.82	0.09	19	0.35	0.19	SO2	Asti
0.76	0.14	31	1.33	0.39	PM10	Asti
0.95	0.16	-12	0.29	0.59	SO2	Avellino
0.72	0.21	-15	0.36	0.28	NO	Avellino
0.68	0.3	30	0.27	1.18	PM10	Avellino
0.91	0.12	-8	1.32	NaN	SO2	Bari
0.8	0.07	5	0.19	0.22	SO2	Barletta-Andria-Trani
0.86	0.24	7	0.33	0.15	NO	Barletta-Andria-Trani
0.92	0.16	-20	0.44	0.44	PM10	Barletta-Andria-Trani
0.89	0.12	-13	0.18	NaN	SO2	Belluno
0.8	0.09	-17	0.7	NaN	PM10	Belluno
1	0	35	0.84	0.8	SO2	Benevento
0.89	0.64	29	0.59	0.3	NO	Benevento
0.98	0.09	-30	NaN	NaN	SO2	Bergamo
0.98	0.14	4	NaN	NaN	NO	Bergamo
0.97	0.09	-29	NaN	NaN	PM10	Bergamo
0.9	0.08	-7	1.19	0.3	SO2	Bologna
0.99	0.11	15	0.34	0.8	NO	Bologna
0.9	0.09	3	1.26	0.56	PM10	Bologna
0.97	0.12	-15	0.4	0.19	SO2	Bolzano
0.83	0.09	-18	0.57	0.16	NO	Bolzano
0.89	0.09	-26	0.43	0.66	PM10	Bolzano
0.98	0.09	-29	1.12	0.31	SO2	Brescia
0.95	0.09	5	0.84	0.31	NO	Brescia
0.97	0.08	-26	0.7	0.29	PM10	Brescia
0.75	0.07	-14	0.35	0.31	SO2	Brindisi
0.77	0.2	31	0.54	0.22	NO	Brindisi
0.6	0.12	-35	0.45	0.45	PM10	Brindisi
0.95	0.19	-14	0.82	0.5	SO2	Cagliari
0.95	0.26	35	0.1	0.19	NO	Cagliari
0.96	0.28	-30	1.25	0.5	PM10	Cagliari
0.71	0.13	-10	1.06	0.18	SO2	Caltanissetta
0.6	0.1	-17	0.22	0.18	NO	Caltanissetta
0.97	0.16	36	0.41	0.29	SO2	Campobasso
0.58	0.1	-25	0.14	0.26	NO	Campobasso
0.45	0.11	29	0.73	0.71	PM10	Campobasso
0.86	0.13	-14	0.28	NaN	SO2	Caserta
0.83	0.15	-16	0.63	NaN	NO	Caserta
0.72	0.11	-19	0.75	NaN	SO2	Catania
0.65	0.12	-25	0.35	NaN	NO	Catania
0.4	0.14	-14	0.29	0.27	SO2	Catanzaro
0.35	0.13	13	NaN	0.27	NO	Catanzaro
0.79	0.13	-13	0.54	0.21	SO2	Chieti
0.92	0.16	12	0.5	0.2	NO	Chieti
0.48	0.13	-24	0.65	0.84	PM10	Chieti
0.93	0.06	-17	NaN	NaN	SO2	Como
0.98	0.11	10	NaN	NaN	NO	Como
0.91	0.08	-8	NaN	0.08	PM10	Como
0.8	0.12	-13	1	1.56	SO2	Cosenza
0.81	0.14	2	0.27	1.29	NO	Cosenza
0.98	0.1	-32	1.95	0.31	SO2	Cremona
0.96	0.1	-27	1.2	NaN	NO	Cremona
0.97	0.1	-26	1.65	1.03	PM10	Cremona
0.64	0.25	-10	0.02	NaN	SO2	Crotone
0.8	0.29	9	0.04	0.27	NO	Crotone
0.94	0.5	30	0.54	0.55	PM10	Crotone
0.76	0.11	15	0.36	0.32	SO2	Cuneo
0.77	0.07	17	0.92	0.28	PM10	Cuneo
0.72	0.14	-16	0.39	0.33	SO2	Enna
0.76	0.38	38	0.07	0.35	NO	Enna
0.92	0.13	9	NaN	0.24	NO	Fermo
0.91	0.09	-12	0.69	0.58	SO2	Ferrara
0.86	0.1	12	0.42	0.62	NO	Ferrara
0.83	0.09	3	1.29	0.29	PM10	Ferrara
0.91	0.08	-10	NaN	NaN	SO2	Firenze
0.99	0.1	12	0.35	NaN	NO	Firenze
0.8	0.14	-4	NaN	NaN	PM10	Firenze
0.98	0.1	-9	0.45	0.39	SO2	Foggia
0.84	0.12	4	0.62	0.19	NO	Foggia
0.75	0.1	-38	0.35	1.12	PM10	Foggia
0.9	0.09	-10	NaN	0.31	SO2	Forli-Cesena
0.97	0.14	31	NaN	0.32	NO	Forli-Cesena
0.82	0.15	-4	NaN	1.1	PM10	Forli-Cesena
0.91	0.14	-15	0.19	0.13	SO2	Frosinone
0.69	0.09	-16	0.65	NaN	NO	Frosinone
0.46	0.14	-31	NaN	NaN	PM10	Frosinone
0.94	0.1	-18	0.49	0.7	SO2	Genova
0.94	0.13	12	0.28	NaN	NO	Genova
0.93	0.1	-7	0.31	0.23	PM10	Genova
0.92	0.1	-29	1.15	1.17	NO	Gorizia
0.94	0.1	-29	0.44	1.65	PM10	Gorizia
0.92	0.14	-10	1.36	NaN	SO2	Grosseto
0.86	0.15	13	0.62	0.28	NO	Grosseto
0.66	0.15	-20	1.16	0.28	PM10	Grosseto
0.93	0.07	-17	1.57	1.19	SO2	Imperia
0.99	0.13	13	NaN	1.37	NO	Imperia
0.89	0.09	-14	0.56	1.82	PM10	Imperia
0.65	0.16	-1	NaN	NaN	SO2	Isernia
0.92	0.27	26	NaN	NaN	NO	Isernia
0.59	0.09	-17	NaN	NaN	PM10	Isernia
0.89	0.12	-15	0.35	0.03	SO2	LAquila
0.33	0.23	10	0.13	0.96	PM10	LAquila
0.93	0.09	-20	0.44	0.3	SO2	LaSpezia
0.98	0.13	10	0.29	0.29	NO	LaSpezia
0.88	0.09	-25	0.47	0.26	PM10	LaSpezia
0.85	0.09	-19	1.37	0.65	SO2	Latina
0.97	0.24	38	0.76	1.35	NO	Latina
0.89	0.14	-12	0.64	0.25	SO2	Lecce
0.95	0.15	9	0.79	0.45	NO	Lecce
0.95	0.08	-26	NaN	NaN	SO2	Lecco
0.96	0.22	31	NaN	NaN	NO	Lecco
0.94	0.08	-20	0.1	0.12	PM10	Lecco
0.87	0.1	-16	0.25	NaN	SO2	Livorno
0.84	0.12	-19	0.65	NaN	NO	Livorno
0.66	0.12	-26	NaN	NaN	PM10	Livorno
0.99	0.12	-37	NaN	NaN	SO2	Lodi
0.97	0.12	-32	NaN	NaN	NO	Lodi
0.98	0.12	-33	NaN	0.08	PM10	Lodi
0.91	0.07	-17	2.18	0.35	SO2	Lucca
0.95	0.09	7	1.47	NaN	NO	Lucca
0.79	0.15	-6	3.03	0.63	PM10	Lucca
0.82	0.12	-13	0.24	0.18	SO2	Macerata
0.92	0.2	27	0.17	0.17	NO	Macerata
0.66	0.16	-10	1.14	NaN	PM10	Macerata
0.98	0.08	-26	1.18	NaN	SO2	Mantova
0.95	0.08	-21	0.55	0.09	NO	Mantova
0.97	0.09	-26	1.72	0.43	PM10	Mantova
0.83	0.08	-17	0.65	0.36	SO2	MassaCarrara
0.91	0.11	6	0.22	0.27	NO	MassaCarrara
0.81	0.16	-8	0.33	0.59	PM10	MassaCarrara
0.52	0.2	-4	0.33	0.42	SO2	Matera
0.58	0.3	0	0.67	NaN	NO	Matera
0.52	0.23	-28	1.37	0.21	PM10	Matera
0.75	0.14	-16	0.3	0.36	SO2	Messina
0.57	0.15	-10	0.67	0.33	NO	Messina
0.97	0.07	-18	1.87	0.45	SO2	Milano
0.95	0.06	5	1.3	0.92	NO	Milano
0.95	0.05	-17	1.01	1.66	PM10	Milano
0.93	0.09	-19	1.7	0.61	SO2	Modena
0.85	0.11	-7	2.16	0.61	PM10	Modena
0.95	0.08	-19	0.87	0.3	SO2	MonzaedellaBrianza
0.94	0.13	10	0.21	0.3	NO	MonzaedellaBrianza
0.94	0.05	-17	0.61	0.85	PM10	MonzaedellaBrianza
0.92	0.06	-17	0.89	0.86	SO2	Napoli
0.91	0.08	-14	1.24	NaN	NO	Napoli
0.74	0.06	15	0.69	NaN	SO2	Novara
0.78	0.1	21	0.36	NaN	PM10	Novara
0.9	0.26	-15	NaN	0.16	SO2	Nuoro
1	0.28	24	NaN	0.33	NO	Nuoro
0.65	0.13	3	0.34	0.25	SO2	Oristano
0.85	0.17	-28	0.9	0.66	PM10	Oristano
0.97	0.09	-20	0.24	NaN	SO2	Padova
0.96	0.15	14	0.18	NaN	NO	Padova
0.91	0.09	-26	0.45	NaN	PM10	Padova
0.87	0.12	-14	0.41	0.43	SO2	Palermo
0.82	0.1	-13	NaN	0.52	NO	Palermo
0.81	0.28	38	0.38	0.5	PM10	Palermo
0.94	0.09	-27	0.41	0.64	SO2	Parma
0.94	0.12	4	0.46	0.29	NO	Parma
0.93	0.09	-26	1.33	NaN	PM10	Parma
0.96	0.07	-19	0.96	0.3	SO2	Pavia
0.95	0.08	4	1.56	NaN	NO	Pavia
0.97	0.08	-9	0.96	0.3	PM10	Pavia
0.91	0.11	-13	NaN	0.22	SO2	Perugia
0.85	0.09	10	NaN	0.24	NO	Perugia
0.51	0.13	-23	NaN	NaN	PM10	Perugia
0.94	0.09	-21	0.56	0.04	SO2	PesaroeUrbino
0.95	0.09	4	0.36	0.16	NO	PesaroeUrbino
0.77	0.15	-13	0.62	0.58	PM10	PesaroeUrbino
0.92	0.08	-17	0.33	0.4	SO2	Pescara
0.86	0.06	5	0.67	0.35	NO	Pescara
0.61	0.1	-31	0.96	1.14	PM10	Pescara
0.95	0.11	-36	0.5	0.46	SO2	Piacenza
0.95	0.13	4	1.53	0.54	NO	Piacenza
0.97	0.11	-26	1.23	0.88	PM10	Piacenza
0.79	0.11	-14	0.32	0.63	SO2	Pisa
0.9	0.13	27	0.66	0.37	NO	Pisa
0.65	0.15	-7	1.71	0.28	PM10	Pisa
0.78	0.11	-19	1.63	0.32	SO2	Pistoia
0.85	0.11	7	0.73	0.27	NO	Pistoia
0.73	0.22	-7	2.1	0.93	PM10	Pistoia
0.81	0.09	-17	0.02	0.6	SO2	Pordenone
0.96	0.16	13	0.28	NaN	NO	Pordenone
0.74	0.17	-9	0.59	NaN	PM10	Pordenone
0.88	0.19	-8	0.22	0.28	SO2	Potenza
0.71	0.22	-4	0.35	0.23	NO	Potenza
0.72	0.1	-15	0.25	1.5	SO2	Prato
0.9	0.1	8	NaN	NaN	NO	Prato
0.59	0.17	-7	1	0.6	PM10	Prato
0.8	0.22	-15	0.77	0.94	SO2	Ragusa
0.95	0.18	15	0.36	0.46	NO	Ragusa
0.94	0.48	31	0.69	0.55	PM10	Ragusa
0.77	0.1	-14	0.97	0.01	SO2	Ravenna
0.79	0.16	18	0.39	0.3	NO	Ravenna
0.69	0.15	-3	0.52	0.3	PM10	Ravenna
0.88	0.19	38	NaN	NaN	SO2	ReggiodiCalabria
0.88	0.09	8	NaN	NaN	NO	ReggiodiCalabria
0.92	0.1	-20	0.55	0.69	SO2	ReggionellEmilia
0.96	0.14	30	0.31	0.35	NO	ReggionellEmilia
0.88	0.12	-8	0.9	0.36	PM10	ReggionellEmilia
0.96	0.12	-8	0.26	0.91	SO2	Rieti
0.83	0.15	16	NaN	0.91	NO	Rieti
0.44	0.18	-27	NaN	0.91	PM10	Rieti
0.93	0.1	-23	0.31	0.71	SO2	Rimini
0.93	0.17	35	0.48	NaN	NO	Rimini
0.84	0.15	-15	0.91	1.21	PM10	Rimini
0.96	0.1	-14	0.62	0.35	SO2	Roma
0.88	0.07	2	0.93	0.65	NO	Roma
0.6	0.1	-30	1.59	0.63	PM10	Roma
0.88	0.16	-13	0.37	0.15	SO2	Rovigo
0.98	0.34	37	0.28	NaN	NO	Rovigo
0.62	0.19	0	0.48	NaN	PM10	Rovigo
0.89	0.11	-18	0.5	0.26	SO2	Salerno
0.84	0.13	-14	0.6	0.26	NO	Salerno
0.85	0.09	-8	0.81	0.38	SO2	Sassari
0.82	0.13	7	0.41	0.51	NO	Sassari
0.77	0.12	-31	0.86	0.64	PM10	Sassari
0.9	0.1	-18	0.41	0.61	SO2	Savona
0.97	0.12	30	0.76	0.32	NO	Savona
0.88	0.09	-7	1.2	0.79	PM10	Savona
0.94	0.09	-5	NaN	0.33	SO2	Siena
0.93	0.16	16	0.02	0.31	NO	Siena
0.48	0.18	-2	0.02	0.31	PM10	Siena
0.71	0.09	-12	0.22	0.9	SO2	Siracusa
0.64	0.15	-33	0.24	0.37	NO	Siracusa
0.94	0.1	-16	0.72	NaN	SO2	Sondrio
0.95	0.13	13	0.3	NaN	NO	Sondrio
0.89	0.06	-17	0.66	0.09	PM10	Sondrio
0.62	0.15	-5	1.15	0.53	SO2	SudSardegna
0.96	0.41	37	0.43	0.7	NO	SudSardegna
0.69	0.31	-21	0.42	1.34	PM10	SudSardegna
0.8	0.17	-12	0.03	0.41	SO2	Taranto
0.88	0.1	-13	0.2	0.86	SO2	Teramo
0.4	0.09	-28	0.99	0.38	PM10	Teramo
0.93	0.13	-13	NaN	0.16	SO2	Terni
0.9	0.23	29	0.36	0.47	NO	Terni
0.61	0.14	-31	0.3	0.15	PM10	Terni
0.84	0.11	14	0.53	NaN	SO2	Torino
0.88	0.11	19	0.26	0.31	PM10	Torino
0.76	0.12	-8	NaN	0.51	SO2	Trapani
0.46	0.1	-7	NaN	0.51	NO	Trapani
0.9	0.1	-15	0.67	0.45	SO2	Trento
0.96	0.12	37	0.45	0.21	NO	Trento
0.8	0.09	-16	0.54	0.36	PM10	Trento
0.92	0.08	-24	0.53	0.17	SO2	Treviso
0.96	0.16	13	0.42	NaN	NO	Treviso
0.9	0.08	-26	1	0.2	PM10	Treviso
0.89	0.09	-18	0.61	0.26	SO2	Trieste
0.96	0.12	23	1.33	0.26	NO	Trieste
0.86	0.09	-27	0.25	NaN	PM10	Trieste
0.65	0.12	-21	0.62	0.95	SO2	Udine
0.84	0.17	10	0.31	0.61	NO	Udine
0.65	0.22	-9	1.21	0.48	PM10	Udine
0.94	0.08	-12	1.84	0.33	SO2	Varese
0.99	0.1	13	1.88	NaN	NO	Varese
0.89	0.08	-7	1.22	0.48	PM10	Varese
0.95	0.09	-20	NaN	0.15	SO2	Venezia
0.99	0.14	12	NaN	0.15	NO	Venezia
0.89	0.09	-26	0.03	0.12	PM10	Venezia
0.73	0.14	-16	0.43	0.71	SO2	Verbano-Cusio-Ossola
0.81	0.18	14	0.16	1.08	NO	Verbano-Cusio-Ossola
0.76	0.12	-10	0.48	0.82	PM10	Verbano-Cusio-Ossola
0.88	0.09	12	NaN	0.6	SO2	Vercelli
0.83	0.08	14	NaN	0.6	PM10	Vercelli
0.92	0.06	-17	0.27	NaN	SO2	Verona
0.99	0.19	31	1.05	0.19	NO	Verona
0.85	0.08	-16	0.54	0.4	PM10	Verona
0.89	0.32	0	1.12	1.36	SO2	ViboValentia
0.9	0.38	2	0.89	1.65	NO	ViboValentia
0.92	0.06	-17	0.66	NaN	SO2	Vicenza
0.99	0.16	16	0.18	0.14	NO	Vicenza
0.85	0.1	-7	0.57	0.14	PM10	Vicenza
0.92	0.17	-6	0.61	0.58	SO2	Viterbo
0.97	0.22	24	0.93	NaN	NOV (NO)	Viterbo
0.58	0.21	-21	2.08	0.6	PM10	Viterbo
